# Supplementary material
Source: PubMed Central journal article supplement (PMC3443629)
Supplement: NIHMS363422-supplement-Supplementary_Data.pdf [file NIHMS363422-supplement-Supplementary_Data.pdf]

Data Supplement for Arroyo et al.

| Characteristics                               |                                  | <u>Hospital Admission</u>      |                | <u>ED Death</u>                |                   |
|-----------------------------------------------|----------------------------------|--------------------------------|----------------|--------------------------------|-------------------|
|                                               |                                  | Unadjusted Odds Ratio (95% CI) |                | Unadjusted Odds Ratio (95% CI) |                   |
| Injury Severity                               |                                  |                                |                |                                |                   |
|                                               | Moderate                         | REF                            | --             | REF                            | --                |
|                                               | Severe                           | 5.371                          | (5.000, 5.769) | 17.578                         | (14.450, 21.384)  |
| Age                                           |                                  |                                |                |                                |                   |
|                                               | <1 year                          | 0.604                          | (0.565, 0.645) | 0.308                          | (0.211, 0.448)    |
|                                               | 1-4 years                        | 0.588                          | (0.552, 0.627) | 0.471                          | (0.350, 0.635)    |
|                                               | 5-9 years                        | 0.695                          | (0.654, 0.738) | 0.351                          | (0.253, 0.487)    |
|                                               | 10-14 years                      | 0.684                          | (0.649, 0.721) | 0.378                          | (0.289, 0.493)    |
|                                               | 15-18 years                      | REF                            | --             | REF                            | --                |
| Sex                                           |                                  |                                |                |                                |                   |
|                                               | Male                             | REF                            | --             | REF                            | --                |
|                                               | Female                           | 0.78                           | (0.747, 0.814) | 0.685                          | (0.550, 0.852)    |
| Race/Ethnicity                                |                                  |                                |                |                                |                   |
|                                               | White                            | REF                            | --             | REF                            | --                |
|                                               | Black or African American        | 1.500                          | (1.388, 1.622) | 3.518                          | (2.596, 4.767)    |
|                                               | Hispanic                         | 1.297                          | (1.242, 1.354) | 2.142                          | (1.714, 2.676)    |
|                                               | Asian                            | 1.231                          | (1.117, 1.357) | 1.087                          | (0.610, 1.935)    |
|                                               | Other                            | 1.27                           | (1.157, 1.393) | 2.707                          | (1.854, 3.954)    |
| Annual Median Household Income*               |                                  |                                |                |                                |                   |
|                                               | <100% Federal Poverty Line (FPL) | REF                            | --             | REF                            | --                |
|                                               | 100-200% FPL                     | 0.756                          | (0.514, 1.113) | 0.605                          | (0.184, 1.991)    |
|                                               | 200-300% FPL                     | 0.649                          | (0.441, 0.955) | 0.359                          | (0.109, 1.182)    |
|                                               | >300% FPL                        | 0.593                          | (0.403, 0.873) | 0.181                          | (0.054, 0.601)    |
| Distance: Residence to Nearest Acute Hospital |                                  |                                |                |                                |                   |
|                                               | 0-5 miles                        | REF                            | --             | REF                            | --                |
|                                               | 6-10 miles                       | 0.958                          | (0.895, 1.026) | 1.158                          | (0.856, 1.568)    |
|                                               | >10 miles                        | 1.093                          | (0.999, 1.195) | 1.159                          | (0.773, 1.736)    |
| Insurance Status                              |                                  |                                |                |                                |                   |
|                                               | Private insurance                | REF                            | --             | REF                            | --                |
|                                               | Public insurance                 | 1.549                          | (1.485, 1.616) | 1.861                          | (1.469, 2.357)    |
|                                               | No insurance                     | 0.641                          | (0.598, 0.688) | 6.41                           | (5.081, 8.086)    |
| Rural Status                                  |                                  |                                |                |                                |                   |
|                                               | Urban                            | REF                            | --             | REF                            | --                |
|                                               | Rural                            | 0.758                          | (0.709, 0.810) | 0.712                          | (0.502, 1.010)    |
| Mechanism of Injury                           |                                  |                                |                |                                |                   |
|                                               | Fall                             | REF                            | --             | REF                            | --                |
|                                               | Cut                              | 5.507                          | (4.596, 6.598) | 46.043                         | (24.946, 84.980)  |
|                                               | Firearm                          | 7.499                          | (6.459, 8.707) | 349.148                        | (218.453, 558.03) |
|                                               | Motor vehicle traffic            | 3.445                          | (3.225, 3.679) | 53.529                         | (34.192, 83.803)  |
|                                               | Pedal (Bike)                     | 0.823                          | (0.748, 0.906) | 0.485                          | (0.065, 3.606)    |
|                                               | Pedestrian                       | 2.697                          | (1.847, 3.938) | 79.571                         | (31.633, 200.157) |
|                                               | Struck                           | 0.526                          | (0.494, 0.560) | 1.373                          | (0.721, 2.614)    |
|                                               | Drowning                         | 2.802                          | (1.077, 7.290) | <0.001                         | (<0.001, >999)    |
|                                               | Machinery                        | 0.35                           | (0.222, 0.552) | 16.224                         | (3.716, 70.834)   |
|                                               | Other transportation             | 1.63                           | (1.481, 1.794) | 5.868                          | (2.767, 12.444)   |
|                                               | Other                            | 0.538                          | (0.463, 0.625) | 2.232                          | (0.520, 9.579)    |

## Data Supplement for Arroyo et al.

| Intent of Injury |  | REF   | --             | REF    | --               |
|------------------|--|-------|----------------|--------|------------------|
| Unintentional    |  | 5.67  | (3.070, 10.47) | 22.807 | (8.375, 62.108)  |
| Intentional      |  | 1.917 | (1.794, 2.048) | 5.075  | (4.118, 6.254)   |
| Assault          |  | 2.564 | (1.782, 3.691) | 22.124 | (12.343, 39.654) |
| Undetermined     |  |       |                |        |                  |

Discharged = 14,222 visits; admission = 34,402 visits; death = 467 visits; total = 49,091 visits.  
\*Annual household income based on zip code of residence, using the 2004 Federal Poverty Line of \$18,850 for a family of four.  
REF = Reference variable

Data Supplement for Arroyo et al.

| Table 2. Demographics of emergency department (ED) visits by California children for mild injuries and injuries with unclassifiable severity resulting in ED disposition of death, 2005-2009. |             |                       |                                       |     |
|-----------------------------------------------------------------------------------------------------------------------------------------------------------------------------------------------|-------------|-----------------------|---------------------------------------|-----|
| Characteristics                                                                                                                                                                               | Mild Injury | Unclassifiable Injury | Combined Mild & Unclassifiable Injury |     |
|                                                                                                                                                                                               | # of Visits | # of Visits           | # of Visits                           | %   |
| Number of Visits                                                                                                                                                                              | 482         | 391                   | 873                                   | 100 |
| Age                                                                                                                                                                                           |             |                       |                                       |     |
| <1 year                                                                                                                                                                                       | 55          | 88                    | 143                                   | 16  |
| 1-4 years                                                                                                                                                                                     | 59          | 112                   | 171                                   | 20  |
| 5-9 years                                                                                                                                                                                     | 54          | 50                    | 104                                   | 12  |
| 10-14 years                                                                                                                                                                                   | 50          | 40                    | 90                                    | 10  |
| 15-18 years                                                                                                                                                                                   | 264         | 101                   | 365                                   | 42  |
| Sex                                                                                                                                                                                           |             |                       |                                       |     |
| Female                                                                                                                                                                                        | 123         | 149                   | 272                                   | 31  |
| Male                                                                                                                                                                                          | 355         | 240                   | 595                                   | 68  |
| Not Available                                                                                                                                                                                 | 4           | 2                     | 6                                     | 1   |
| Race/Ethnicity                                                                                                                                                                                |             |                       |                                       |     |
| White                                                                                                                                                                                         | 104         | 157                   | 261                                   | 30  |
| Black/African-American                                                                                                                                                                        | 78          | 32                    | 110                                   | 13  |
| Hispanic                                                                                                                                                                                      | 224         | 125                   | 349                                   | 40  |
| Asian                                                                                                                                                                                         | 18          | 24                    | 42                                    | 5   |
| American Indian/Alaska Native                                                                                                                                                                 | 1           | 4                     | 5                                     | 1   |
| Other/Not Available                                                                                                                                                                           | 57          | 49                    | 106                                   | 12  |
| Insurance Status                                                                                                                                                                              |             |                       |                                       |     |
| Private Insurance                                                                                                                                                                             | 122         | 162                   | 284                                   | 33  |
| Public Insurance                                                                                                                                                                              | 163         | 119                   | 282                                   | 32  |
| No Insurance                                                                                                                                                                                  | 188         | 101                   | 289                                   | 33  |
| Other                                                                                                                                                                                         | 9           | 9                     | 18                                    | 2   |
| Rural Status                                                                                                                                                                                  |             |                       |                                       |     |
| Rural                                                                                                                                                                                         | 32          | 49                    | 81                                    | 9   |
| Urban                                                                                                                                                                                         | 450         | 342                   | 792                                   | 91  |
| Annual Median Household Income*                                                                                                                                                               |             |                       |                                       |     |
| <100% Federal Poverty Line (FPL)                                                                                                                                                              | 3           | 0                     | 3                                     | 0.3 |
| 100-200% FPL                                                                                                                                                                                  | 195         | 99                    | 294                                   | 34  |
| 200-300% FPL                                                                                                                                                                                  | 188         | 158                   | 346                                   | 40  |
| >300% FPL                                                                                                                                                                                     | 80          | 121                   | 201                                   | 23  |
| Not Available                                                                                                                                                                                 | 16          | 13                    | 29                                    | 3   |
| Distance: Residence to Nearest Acute Hospital                                                                                                                                                 |             |                       |                                       |     |
| 0-5 miles                                                                                                                                                                                     | 427         | 339                   | 766                                   | 88  |
| 6-10 miles                                                                                                                                                                                    | 39          | 27                    | 66                                    | 8   |
| >10 miles                                                                                                                                                                                     | 15          | 24                    | 39                                    | 4   |
| Not Available                                                                                                                                                                                 | 1           | 1                     | 2                                     | 0.2 |
| Major Injury Categories                                                                                                                                                                       |             |                       |                                       |     |
| Fracture/Dislocation                                                                                                                                                                          | 15          | 0                     | 15                                    | 2   |
| Muscle Sprain                                                                                                                                                                                 | 4           | 0                     | 4                                     | 0.4 |
| Intracranial/Nervous System                                                                                                                                                                   | 15          | 0                     | 15                                    | 2   |
| Abdomen/Thorax                                                                                                                                                                                | 29          | 0                     | 29                                    | 3   |
| Open Wounds                                                                                                                                                                                   | 161         | 0                     | 161                                   | 18  |
| Superficial/Contusion                                                                                                                                                                         | 6           | 0                     | 6                                     | 1   |

Data Supplement for Arroyo et al.

|                       |     |     |     |     |
|-----------------------|-----|-----|-----|-----|
| Crushing              | 4   | 0   | 4   | 0.4 |
| Burns                 | 1   | 5   | 6   | 1   |
| Other/Not Available   | 193 | 385 | 578 | 66  |
| Mechanism of Injury^  |     |     |     |     |
| Fall                  | 15  | 7   | 22  | 3   |
| Cut                   | 25  | 0   | 25  | 3   |
| Firearm               | 197 | 6   | 203 | 23  |
| Motor Vehicle Traffic | 147 | 58  | 206 | 24  |
| Pedal (Bike)          | 2   | 0   | 2   | 0.2 |
| Pedestrian            | 6   | 1   | 7   | 1   |
| Struck                | 12  | 1   | 13  | 1   |
| Drowning              | 6   | 207 | 213 | 24  |
| Machinery             | 1   | 0   | 1   | 0.1 |
| Suffocation           | 3   | 72  | 75  | 9   |
| Other Transportation  | 14  | 5   | 19  | 2   |
| Other/Not available   | 52  | 42  | 94  | 11  |
| Intent of Injury      |     |     |     |     |
| Unintentional         | 276 | 315 | 591 | 68  |
| Intentional           | 8   | 64  | 72  | 8   |
| Assault               | 180 | 10  | 190 | 22  |
| Other/Not available   | 18  | 2   | 20  | 2   |

\*Annual median household income based on zip code of residence, using the 2004 Federal Poverty Line of \$18,850 for a family of four.

^Mechanism of injury categories are not mutually exclusive and may include classifiable external cause of injury codes (e-code) in any of the five fields.

Data Supplement for Arroyo et al.

| Table 3. Demographics of emergency department visits by California children for mild injuries resulting in hospital admission of a length of stay less than 1 day, 2005-2009. |                          |      |
|-------------------------------------------------------------------------------------------------------------------------------------------------------------------------------|--------------------------|------|
| Characteristics                                                                                                                                                               | Length of Stay<br><1 day |      |
|                                                                                                                                                                               | # of Visits              | %    |
| Number of Visits                                                                                                                                                              | 31,305                   | 100  |
| Age                                                                                                                                                                           |                          |      |
| <1 year                                                                                                                                                                       | 2,579                    | 8    |
| 1-4 years                                                                                                                                                                     | 4,909                    | 15   |
| 5-9 years                                                                                                                                                                     | 7,545                    | 24   |
| 10-14 years                                                                                                                                                                   | 6,499                    | 20   |
| 15-18 years                                                                                                                                                                   | 9,773                    | 31   |
| Sex                                                                                                                                                                           |                          |      |
| Female                                                                                                                                                                        | 10,625                   | 34   |
| Male                                                                                                                                                                          | 20,677                   | 66   |
| Not Available                                                                                                                                                                 | 3                        | <0.1 |
| Race/Ethnicity                                                                                                                                                                |                          |      |
| White                                                                                                                                                                         | 11,536                   | 37   |
| Black/African-American                                                                                                                                                        | 2,416                    | 7    |
| Hispanic                                                                                                                                                                      | 13,515                   | 43   |
| Asian                                                                                                                                                                         | 1,684                    | 5    |
| American Indian/Alaska Native                                                                                                                                                 | 76                       | 0.2  |
| Other                                                                                                                                                                         | 1,716                    | 5    |
| Not Available                                                                                                                                                                 | 362                      | 1    |
| Insurance Status                                                                                                                                                              |                          |      |
| Private Insurance                                                                                                                                                             | 15,295                   | 48   |
| Public Insurance                                                                                                                                                              | 13,577                   | 43   |
| No Insurance                                                                                                                                                                  | 2,046                    | 6    |
| Other                                                                                                                                                                         | 383                      | 1    |

Data Supplement for Arroyo et al.

| Table 4. Analysis of interaction effects in the model for emergency department (ED) disposition of California children with moderate and severe injuries*                                                                      |                        |                       |
|--------------------------------------------------------------------------------------------------------------------------------------------------------------------------------------------------------------------------------|------------------------|-----------------------|
| Interaction                                                                                                                                                                                                                    | Admission<br>(p-value) | ED Death<br>(p-value) |
| <b>Race and Intent of Injury</b>                                                                                                                                                                                               |                        |                       |
| White race & assault                                                                                                                                                                                                           | 0.5065                 | 0.838                 |
| White race & intentional injury                                                                                                                                                                                                | 0.6119                 | 1.000                 |
| Black/African-American race & assault                                                                                                                                                                                          | 0.9583                 | 0.837                 |
| Black/African-American race & intentional injury                                                                                                                                                                               | 0.8389                 | 0.950                 |
| Hispanic ethnicity & assault                                                                                                                                                                                                   | 0.9583                 | 0.840                 |
| Hispanic ethnicity & intentional injury                                                                                                                                                                                        | 0.9682                 | 0.990                 |
| Asian race & assault                                                                                                                                                                                                           | 0.8976                 | 0.866                 |
| Asian race & intentional injury                                                                                                                                                                                                | 0.5824                 | 0.964                 |
| <b>Sex and Intent of Injury</b>                                                                                                                                                                                                |                        |                       |
| Female sex & assault                                                                                                                                                                                                           | 0.1599                 | 0.762                 |
| Female sex & intentional injury                                                                                                                                                                                                | 0.4557                 | 0.056                 |
| Female Sex & Firearm Mechanism of Injury                                                                                                                                                                                       | 0.4138                 | 0.124                 |
| *Each interaction was included in the model separately to assess interaction effects. Interactions terms having a p-value <0.05 was considered to be statistically significant and remained in the model for further analysis. |                        |                       |

Data Supplement for Arroyo et al.

| Table 5. Injury-related emergency department visit rates, 2005-2009*.                                                                                                                                                                                                                    |                                   |
|------------------------------------------------------------------------------------------------------------------------------------------------------------------------------------------------------------------------------------------------------------------------------------------|-----------------------------------|
| Characteristics                                                                                                                                                                                                                                                                          | ED Visit Rate<br>per 1000 persons |
| Total                                                                                                                                                                                                                                                                                    | 67.1                              |
| Age                                                                                                                                                                                                                                                                                      |                                   |
| 0-4 years                                                                                                                                                                                                                                                                                | 76.7                              |
| 5-9 years                                                                                                                                                                                                                                                                                | 56.5                              |
| 10-14 years                                                                                                                                                                                                                                                                              | 68.2                              |
| 15-18 years                                                                                                                                                                                                                                                                              | 66.6                              |
| Sex                                                                                                                                                                                                                                                                                      |                                   |
| Female                                                                                                                                                                                                                                                                                   | 53.6                              |
| Male                                                                                                                                                                                                                                                                                     | 93.9                              |
| Race/Ethnicity                                                                                                                                                                                                                                                                           |                                   |
| White                                                                                                                                                                                                                                                                                    | 79.0                              |
| Black/African-American                                                                                                                                                                                                                                                                   | 68.8                              |
| Hispanic                                                                                                                                                                                                                                                                                 | 54.9                              |
| Asian                                                                                                                                                                                                                                                                                    | 24.5                              |
| American Indian/Alaska Native                                                                                                                                                                                                                                                            | 16.2                              |
| *Rates were calculated by dividing the number of visits in each demographic category from the Office of Statewide Health Planning and Development dataset by the RAND California bridged-race postcensal population estimates by race/ethnicity and age group based on Census 2000 data. |                                   |

Data Supplement for Arroyo et al.

| Table 6. Injury-related emergency department visit rates by insurance status and severity per 1,000 persons, 2005 & 2007* |             |                |      |             |      |                 |      |               |      |                 |      |       |       |
|---------------------------------------------------------------------------------------------------------------------------|-------------|----------------|------|-------------|------|-----------------|------|---------------|------|-----------------|------|-------|-------|
| Insurance Type <sup>†</sup>                                                                                               | Denominator | Overall Injury |      | Mild Injury |      | Moderate Injury |      | Severe Injury |      | Hospitalization |      | Death |       |
|                                                                                                                           |             | #              | Rate | #           | Rate | #               | Rate | #             | Rate | #               | Rate | #     | Rate  |
| No Insurance                                                                                                              | 1,188,640   | 113,283        | 95   | 105,092     | 88   | 2,244           | 1.89 | 347           | 0.29 | 2,318           | 1.95 | 115   | 0.097 |
| Private Insurance                                                                                                         | 11,681,581  | 548,706        | 47   | 514,064     | 44   | 12,058          | 1.03 | 1,951         | 0.17 | 14,266          | 1.22 | 69    | 0.006 |
| Public Insurance                                                                                                          | 6,800,556   | 395,324        | 58   | 367,812     | 54   | 8,010           | 1.18 | 1,898         | 0.28 | 14,959          | 2.20 | 96    | 0.014 |
| Total                                                                                                                     | 19,670,777  | 1,057,313      | 54   | 986,968     | 50   | 22,312          | 1.13 | 4,196         | 0.21 | 31,543          | 1.60 | 280   | 0.014 |

\*Rates were calculated by dividing the number of emergency department visits from the Office of Statewide Health Planning and Development dataset by population estimates by insurance status from the California Health Interview Survey dataset for 2005 and 2007. Rates are visits per 1000 persons.

<sup>†</sup>Private insurance includes commercial insurance, preferred provider organizations (PPO), automobile medical insurance, exclusive provider organizations, and health maintenance organizations (HMO). Public insurance includes Medicare, Medicaid, federal or Title V programs. Other insurance includes disability insurance, Veterans' Affairs plan, and workers' compensation health claims.
